# Supplementary material for: Metabolic Pathway Engineering Improves Dendrobine Production in Dendrobium catenatum
Source: MDPI journal article supplement (doi:10.3390/ijms25010397), 2023-12-28
Supplement: s1 [file s1]

## Metabolic pathway engineering improves dendrobine production in *Dendrobium catenatum*

Meili Zhao <sup>1,2,†</sup>, Yanchang Zhao <sup>3,†</sup>, Zhenyu Yang <sup>1,4</sup>, Feng Ming <sup>4</sup>, Jian Li <sup>1,2</sup>,  
Demin Kong <sup>1,2</sup>, Yu Wang <sup>1,2</sup>, Peng Chen <sup>1,2</sup>, Meina Wang <sup>1,2,\*</sup> and Zhicai Wang <sup>1,2,\*</sup>

1 Shenzhen Key Laboratory for Orchid Conservation and Utilization, The National Orchid Conservation Center of China and the Orchid Conservation & Research Center of Shenzhen, Shenzhen 518114, China; 17720798949@163.com (M.Z.); yangzhenyu.eco@foxmail.com (Z.Y.); lee799908@hotmail.com (J.L.); damykong@126.com (D.K.); 15361439572@163.com (Y.W.); chenpeng1003@163.com (P.C.)

2 Key Laboratory of National Forestry and Grassland Administration for Orchid Conservation and Utilization, The National Orchid Conservation Center of China and the Orchid Conservation & Research Center of Shenzhen, Shenzhen 518114, China

3 State Key Laboratory for Conservation and Utilization of Subtropical Agro-Bioresources, South China Agricultural University, Guangzhou 510642, China; 13965002218@163.com

4 Shanghai Key Laboratory of Plant Molecular Sciences, College of Life Sciences, Shanghai Normal University, Shanghai 200234, China; fming@fudan.edu.cn

\* Correspondence: wangmn@sztcg.com (M.W.); wangzc@cnocc.cn (Z.W.);

Tel.: +86-0755-25712047 (M.W.); +86-0755-25723979 (Z.W.)

† The authors contributed equally to this work.

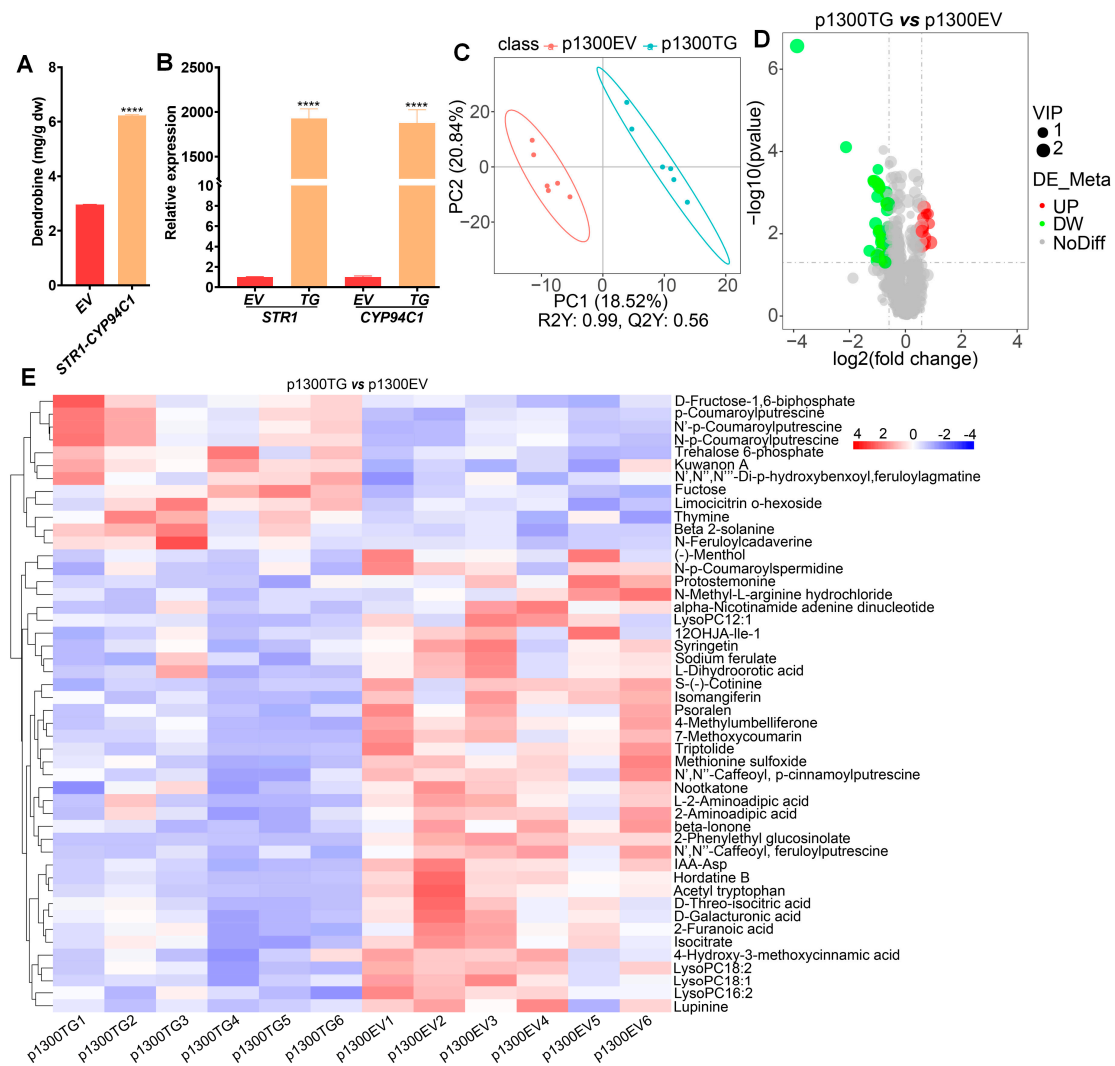

**Figure S1.** *STR1-CYP94C1* (TG) enhanced dendrobine production in *Dendrobium catenatum* leaves but not in *Nicotiana benthamiana* leaves. (A) Dendrobine accumulation in *D. catenatum* leaves infiltrated with *Agrobacterium* carrying pCambia1300-*STR1-CYP94C1*. (B) qRT-PCR expression analysis of *STR1* and *CYP94C1* in *N. benthamiana* leaves infiltrated with *Agrobacterium* carrying pCambia1300-*STR1-CYP94C1*. (C) The partial least squares-discriminant analysis (PLS-DA) score plots based on the GC-MS data of TG-expressing *N. benthamiana* leaves in comparison with empty vector controls (n = 6). (D) Variable importance for projection (VIP) plot showing the differential metabolites in TG-expressing *N. benthamiana* leaves compared to empty vector controls. (E) A heatmap hierarchical clustering of the differentially accumulated metabolites (DAMs) in TG-multigene expressing leaves of *N. benthamiana*. The log<sub>2</sub> of the metabolite quantification was used. The columns indicate the TG-multigene and the empty vector control expressing samples, each with six replicates, while the rows correspond to the different metabolites. Statistical significance in (A) and (B) was demonstrated as \*\*\*\*  $P \leq 0.0001$ .

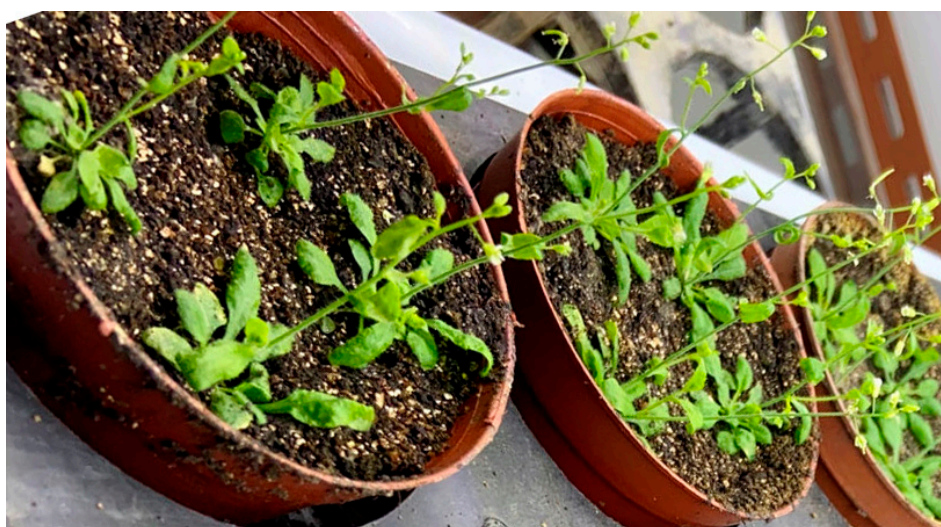

*EV*

*SG*

**Figure S2.** Representative images of earth-growing *Arabidopsis* transgenic plants. Image showed plants growing in earth pots for 1 month. *EV*: empty vector. *SG*: seven genes.

**Table S1.** Cellular localization prediction of proteins

| Proteins | Location        | LocDB | PotLocDB | Neural Nets | Pentamers | Integral |
|----------|-----------------|-------|----------|-------------|-----------|----------|
| CMK      | Chloroplast     | 0.0   | 5.0      | 0.00        | 3.24      | 8.84     |
| DXR      | Chloroplast     | 10.0  | 3.0      | 0.00        | 5.24      | 9.29     |
| MCT      | Chloroplast     | 0.0   | 5.0      | 0.00        | 1.91      | 9.19     |
| STR1     | Plasma membrane | 10.0  | 0.0      | 0.96        | 0.83      | 9.49     |
| CYP94C1  | Plasma membrane | 0.0   | 2.9      | 0.91        | 0.48      | 5.93     |
| BCAT2    | Cytoplasmic     | 3.2   | 0.0      | 0.0         | 0.32      | 2.61     |
| METTL23  | Extracellular   | 0.0   | 0.0      | 0.95        | 2.14      | 2.46     |
| CMEAO    | Extracellular   | 0.0   | 0.0      | 0.92        | 1.76      | 2.43     |
| MYB61    | Nuclear         | 5.0   | 3.0      | 0.00        | 0.13      | 8.28     |

**Table S2.** Primers used in this study

| Vector construction primers |         |                                    |
|-----------------------------|---------|------------------------------------|
| <i>DXR</i>                  | Forward | 5'-ATGGCGTTGAAGCTGCCAT-3'          |
|                             | Reverse | 5'-CTAAGCAGGAACTGGACTCAATCC-3'     |
| <i>MCT</i>                  | Forward | 5'-ATGATGGCACTCCCATATCAGC-3'       |
|                             | Reverse | 5'-TCATGTTTCCATGTTTATTATCCTCTCT-3' |
| <i>CMK</i>                  | Forward | 5'-ATGGCTTCTGTGTCCAACCAC-3'        |
|                             | Reverse | 5'-TTATTCTCCTGTTTGTGACATCTCTTC-3'  |
| <i>MET</i>                  | Forward | 5'-ATGAGTACTCGATCTATAGAAATTGCTG-3' |
|                             | Reverse | 5'-CTAATCGCGATAGATAATGAACACAG-3'   |
| <i>BCAT2</i>                | Forward | 5'-ATGTTGACAAGAAGAATTCCTCAAA-3'    |
|                             | Reverse | 5'-TTAGTCAATCTCAACCGTCCATC-3'      |
| <i>MYB61</i>                | Forward | 5'-ATGGGAAAGCAATCCTACTTACAC-3'     |
|                             | Reverse | 5'-CTAAGACTGCAGCTGCGGC-3'          |
| <i>CMEAO</i>                | Forward | 5'-ATGGCCGCAGCTGAGGA-3'            |
|                             | Reverse | 5'-TCACAACTTACTGAGCAAAACATTCT-3'   |
| <i>STR1</i>                 | Forward | 5'-ATGGCACTCGCTGGGGC-3'            |
|                             | Reverse | 5'-TTACTCTAATGTAAATACGGCTAT-3'     |
| <i>CYP94C1</i>              | Forward | 5'-ATGGAACAAGTCGTCTCCTTTCTC-3'     |
|                             | Reverse | 5'-TCATCTCCTCTTGCTCACTCGA-3'       |
| qRT-PCR primers             |         |                                    |
| <i>qAtActin</i>             | Forward | 5'-CACTTGCACCAAGCAGCATGAAGA-3'     |
|                             | Reverse | 5'-AATGGAACCACCGATCCAGACACT-3'     |
| <i>qSTR1</i>                | Forward | 5'-TCAACTTTCAGAGGAGGCACTTC-3'      |
|                             | Reverse | 5'-CTTGTCACCTTTCAGCCAGTATCT-3'     |
| <i>qCYP94C1</i>             | Forward | 5'-GCCTTCATCTCCACCTCCTTC-3'        |
|                             | Reverse | 5'-AGGTGAGTGTACCAATCGCAGA-3'       |
| <i>qDXR</i>                 | Forward | 5'-TCATAGAGGTCGCATGGCATC-3'        |
|                             | Reverse | 5'-TTGTGTTTATGTGCAAGGGGAA-3'       |
| <i>qMETTL23</i>             | Forward | 5'-TGGTGCTGATGTCGGATTTG-3'         |
|                             | Reverse | 5'-CTTCCGGCGATCTCATTAGC-3'         |
| <i>qDcActin</i>             | Forward | 5'-GAAGCCCAGTCCAAAAGAGGTATCC-3'    |
|                             | Reverse | 5'-ACATGGCAGGCACATTGAAAGTCTC-3'    |
| <i>qNbActin7</i>            | Forward | 5'-CGTCTGTGATAATGGGACTGGA-3'       |
|                             | Reverse | 5'-CATCCCAGTTGCTAACAATACCAT-3'     |
| <i>qBCAT2</i>               | Forward | 5'-CGAAAGCTATCGTGCAACTCC-3'        |
|                             | Reverse | 5'-CTTTCGGATAAATATGTTGCAGGA-3'     |
| <i>qCMK</i>                 | Forward | 5'-CTAGAGCCCCCTGCATTTGA-3'         |

|               |         |                                  |
|---------------|---------|----------------------------------|
|               | Reverse | 5'-TAAACAAATTGAGGTGGGTCTGG-3'    |
| <i>qMCT</i>   | Forward | 5'-TGGTGTTTCCTGTAAAGGCTACTATT-3' |
|               | Reverse | 5'-TGTTCCAAGTGTTCCACGATAGA-3'    |
| <i>qMYB61</i> | Forward | 5'-CCTGAGGAGGATGAGAAAGTTGC-3'    |
|               | Reverse | 5'-AACTGTGCTGCAATCTGAGACC-3'     |
| <i>qCMEAO</i> | Forward | 5'-GAATAGGTCACTTGAGGAAACGG-3'    |
|               | Reverse | 5'-TCAATGTCACTAGGCGGCAC-3'       |
